# Supplementary material for: Deciphering the heterogeneity of the Lyve1+ perivascular macrophages in the mouse brain
Source: PubMed Central journal article supplement (PMC9712536; doi:10.1038/s41467-022-35166-9), 2022-11-30
Supplement: 41467_2022_35166_MOESM1_ESM.pdf [file 41467_2022_35166_MOESM1_ESM.pdf]

## **Supplementary Information**

### **Deciphering the heterogeneity of the Lyve1<sup>+</sup> perivascular Macrophages in the mouse brain**

C. Siret, M. van Lessen, J. Bavais, H. W. Jeong, S. K. Reddy Samawar, K. Kapupara, S. Wang, M. Simic, L. de Fabritus, A. Tchoghandjian, M. Fallet, H. Huang, S. Sarrazin, M.H. Sieweke, R. Stumm, L. Sorokin, R. H. Adams, S. Schulte-Merker, F. Kiefer, S.A. van de Pavert

Supplementary Figures and Figure Legends 1-6

Supplementary Tables 1 and 2

## Supplementary Figure 1

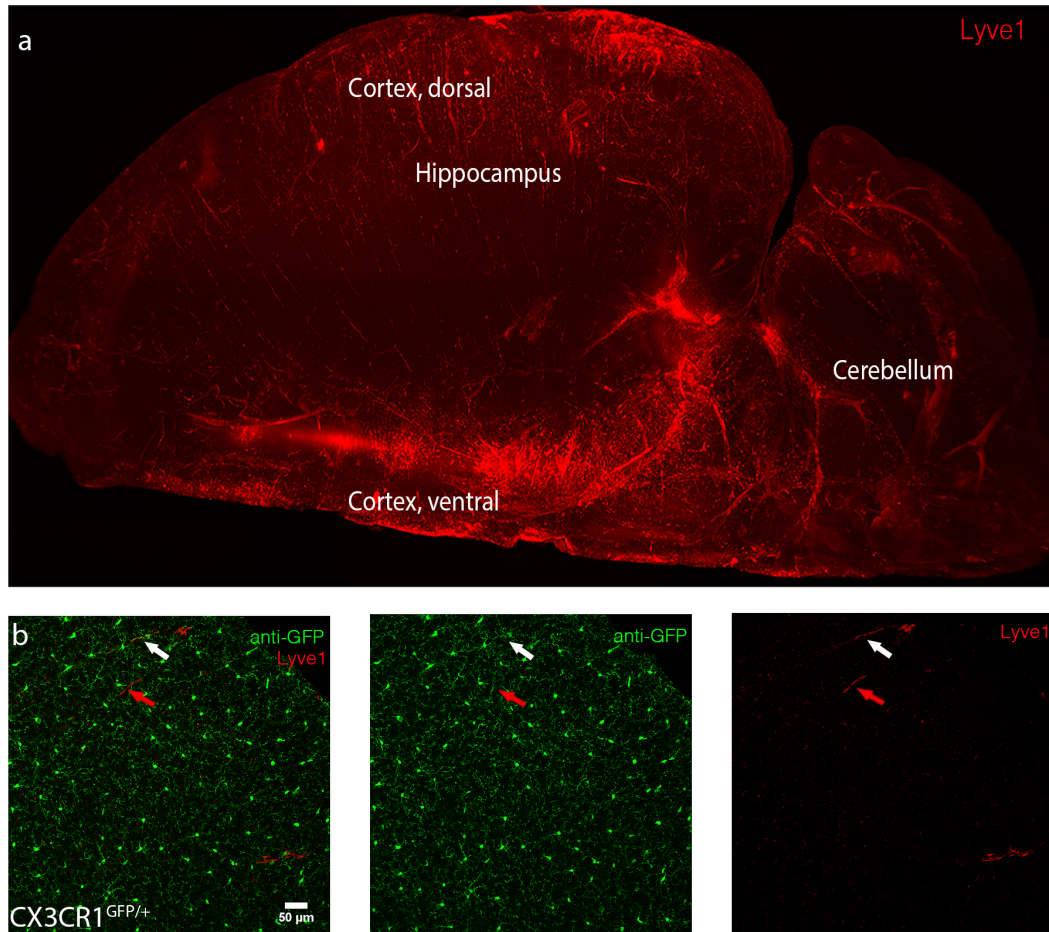

**Supplementary Figure 1: CX3CR1<sup>-</sup>pvM characterization.** (a) Lightsheet imaging of a cleared adult C57BL/6J mouse brain immunolabeled with anti-Lyve1 using the iDisco+ protocol (5550µm maximum intensity projection), related to video 1. (n=5) (b) Immunofluorescence microscopy on brain parenchyma sections of *Cx3cr1<sup>GFP</sup>* in the dorsal cortex, using an anti-GFP to enhance the GFP signal (green) with Lyve1 staining labeled in red. White arrows show the conventional pvM population and red arrows show the non-conventional pvM population (n= 3).

Supplementary Figure 2

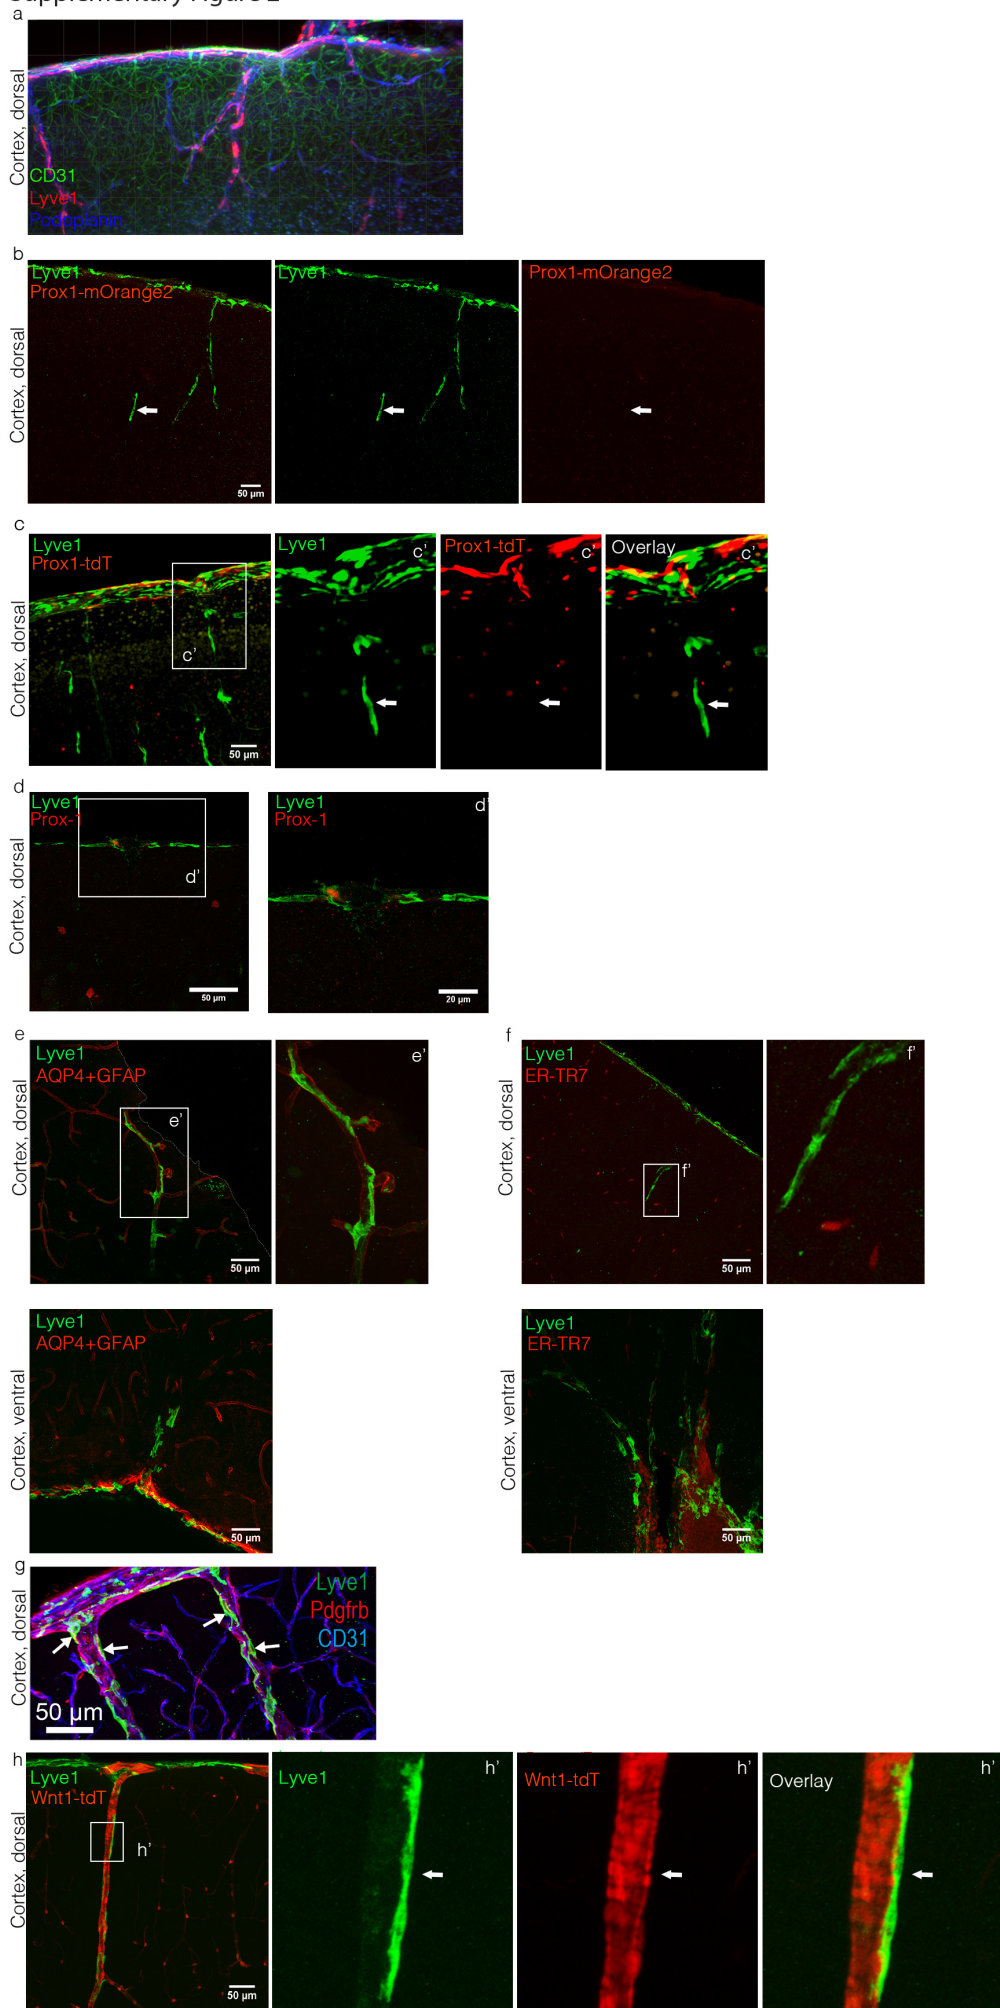

**Supplementary Figure 2: Lyve1<sup>+</sup> cells are neither lymphatic endothelial cells (LEC), astrocytes, fibroblasts or pericytes.** (a) 1080µm maximum intensity projection of lightsheet microscope acquisition of the dorsal cortex illustrating the « cul de sac of the pia mater » defined by the podoplanin labeling, structure emanating from the pia mater (CD31 in green, Lyve1 in red and podoplanin in blue) (n= 2). (b) Confocal analysis of *Prox<sup>mOrange2</sup>* brain sections stained for Lyve1 (green) confirmed that Lyve1<sup>+</sup> cells do not express mOrange2 (red) (white arrows) (34µm maximum intensity projection). (n=4) (c) Confocal analysis of *Prox1-CreERT2<sup>+/-</sup>; Rosa<sup>tdTomato</sup>* brain sections stained for Lyve1 (green) confirmed that Lyve1<sup>+</sup> cells do not express tdTomato (red) (white arrows) (88µm maximum intensity projection) (n=2). (d) LEC identification (Lyve1<sup>+</sup> Prox1<sup>+</sup>) in the pia mater in the dorsal cortex by Prox1 antibody staining (red) on C57BL/6J mouse brain in combination with Lyve1 (green). Prox1<sup>+</sup> neuron cellular bodies are observed in the parenchyma (13µm maximum intensity projection) (n=3). (e) Astrocyte identity was excluded by AQP4 and GFAP (red) staining (24µm maximum intensity projection for the dorsal cortex and 17µm maximum intensity projection for the ventral cortex) (n=3), (f) fibroblast identity was excluded by ER-TR7 staining (50µm maximum intensity projection for the dorsal cortex and 8µm maximum intensity projection for the ventral cortex) (n=3) and (g) pericyte identity was excluded by PDGFRβ (red) staining (n=1). (h) Confocal analysis of *Wnt-Cre; Rosa26<sup>tdTomato</sup>* (37µm maximum intensity projection) brain sections stained for Lyve1 (green), containing tdTomato (red). (n= 3)

## Supplementary Figure 3

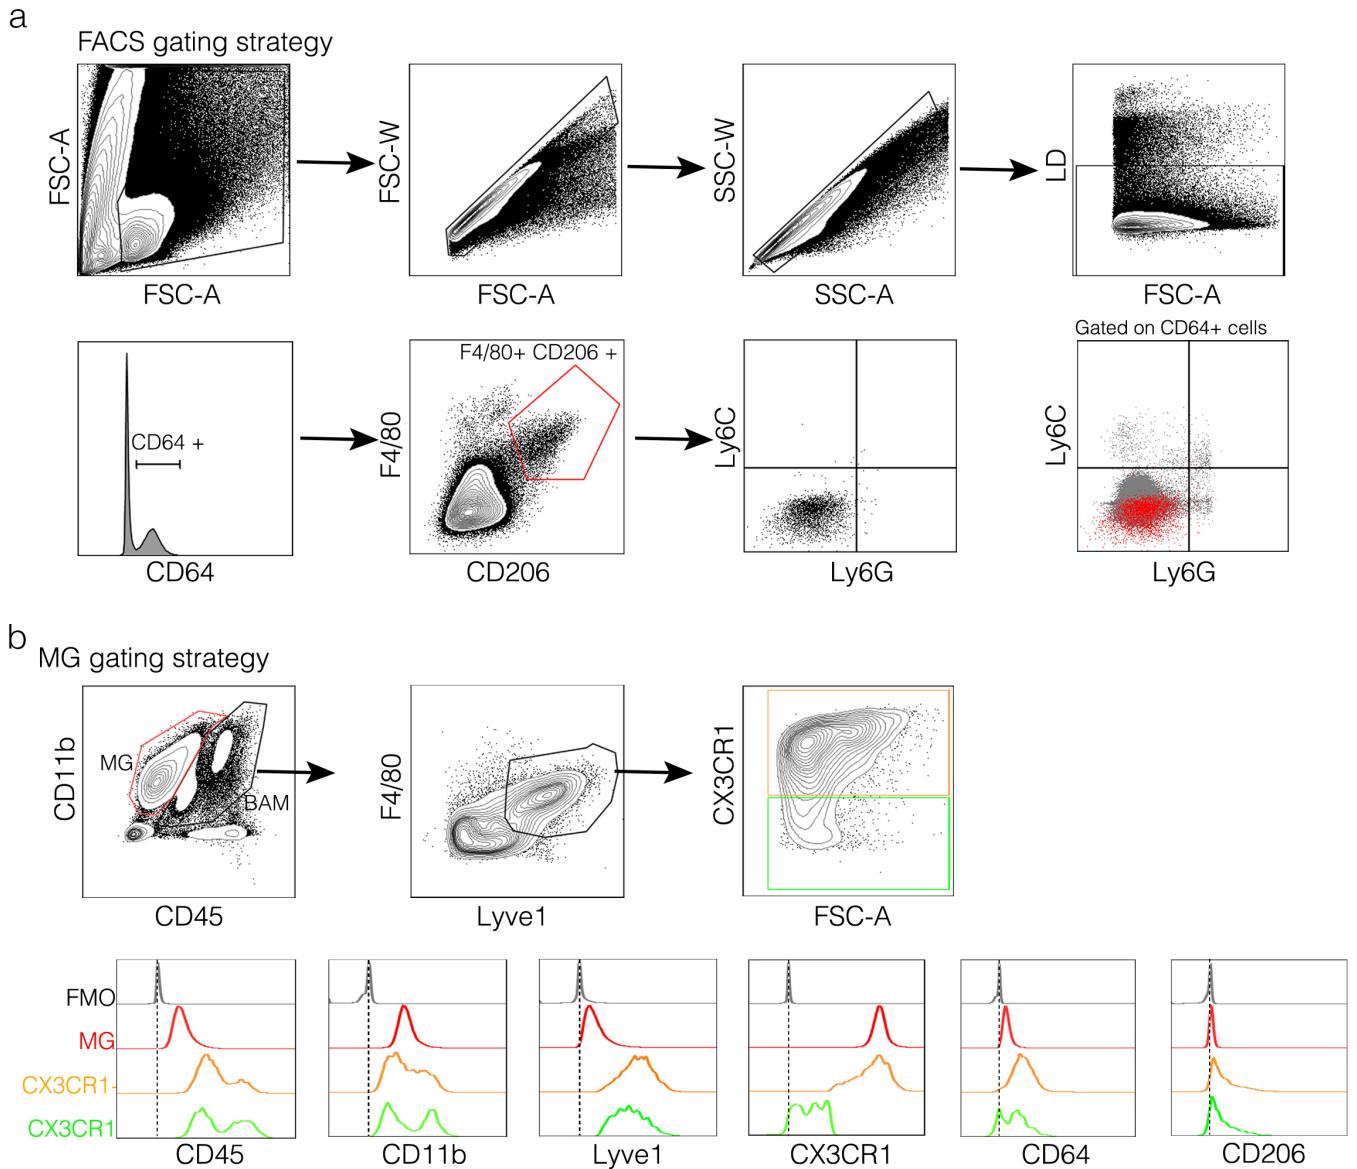

**Supplementary Figure 3: Confirmation of the Lyve1<sup>+</sup>CX3CR1<sup>-</sup> population by flow cytometry (a)**

Flow cytometry gating strategy showing CD64<sup>+</sup>F4/80<sup>+</sup>CD206<sup>+</sup> negative for Ly6C/Ly6C. **(b)** Gating of microglia (MG) and border-associated macrophages (BAM) isolated from *Cx3cr1*<sup>GFP</sup> brain parenchyma and subsequent showing Lyve1<sup>+</sup>F4/80<sup>+</sup> BAM and CX3CR1<sup>+</sup>/CX3CR1<sup>-</sup> gating for these Lyve1<sup>+</sup>F4/80<sup>+</sup> BAMs and on histograms the expressions of CD45, CD11b, Lyve1, CX3CR1, CD64 and CD163 (in red for MG, in orange for Lyve1<sup>+</sup> F4/80<sup>+</sup>CX3CR1<sup>+</sup> BAM and in green for Lyve1<sup>+</sup>F4/80<sup>+</sup>CX3CR1<sup>-</sup> BAMs). FMOs are in grey. (1 individual experiment, n= 3 animals)

Supplementary Figure 4

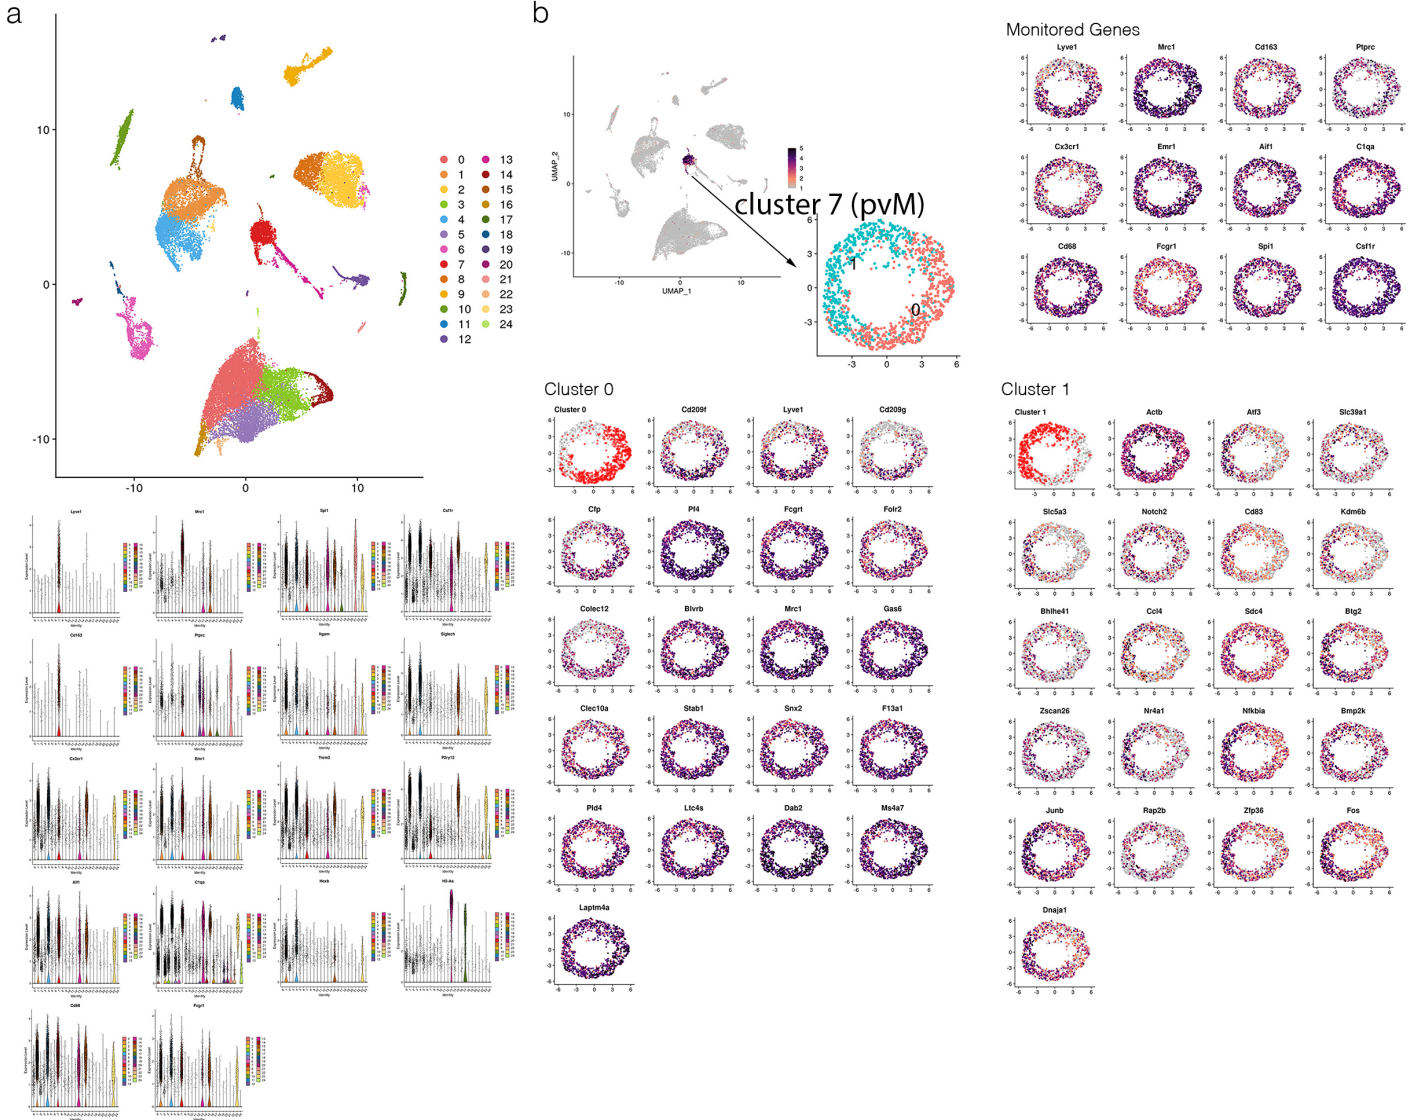

**Supplementary Figure 4: Transcriptional profiling of the pvM subsets. (a)** UMAP plot showing all the clusters. One cluster, number 7, contained *Lyve1*<sup>+</sup> expression as visualized in the Violin plot below. Selected genes associated with macrophages or microglia are further shown in the violin plots to determine exactly in which clusters they are expressed. **(b)** Cells from cluster 7 could be further segregated into 2 clusters. Segregation occurred on *Lyve1*, *Cd209f* and *Cd209g* and other genes show in the panel of cluster 0. In cluster 1, Fos pathway associated genes such as *Fos*, *Junb* and *Atf3* were higher expressed compared to cluster 0. However, as shown in the panel with the monitored genes, there was no segregation on *Cx3cr1*, *Ptprc* (encoding CD45) or *Spi1* (encoding PU.1).

Supplementary Figure 5

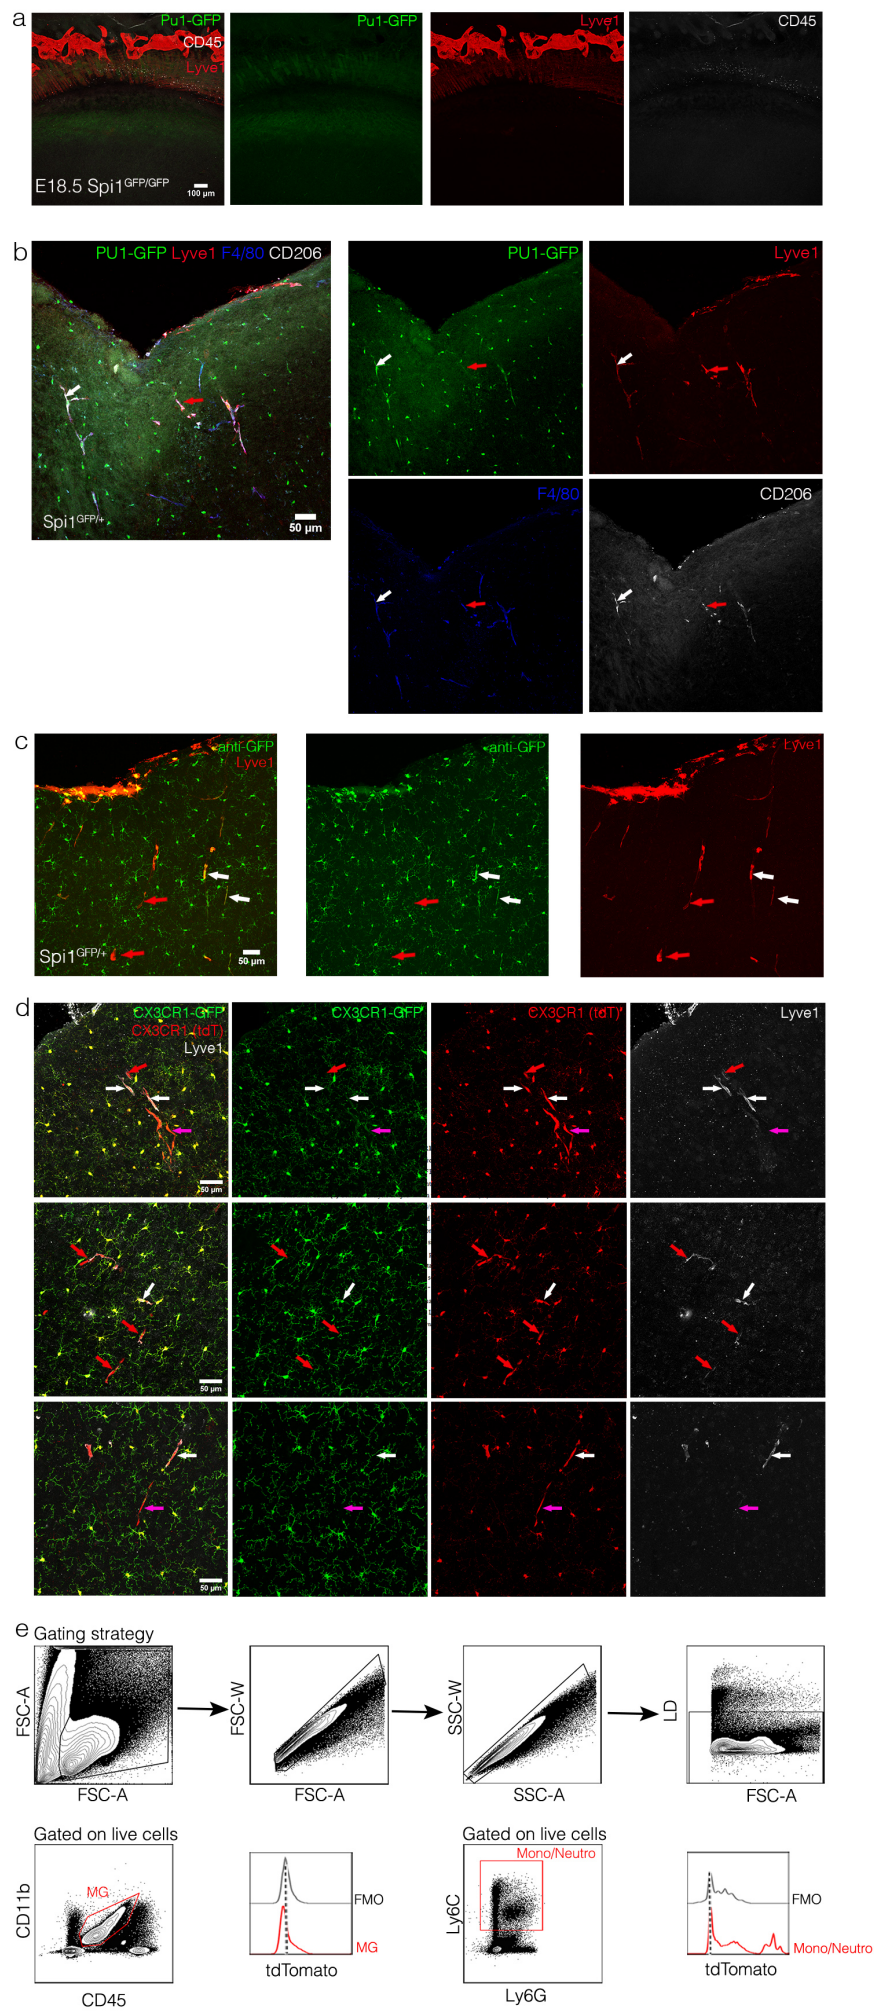

**Supplementary Figure 5: The origin of CX3CR1<sup>-</sup> Lyve1<sup>+</sup> perivascular macrophages.** (a) Immunofluorescence of the section of a E18.5 head from a *Spi1<sup>GFP/+</sup>* embryo (PU1-GFP in green), labeled with  $\alpha$ Lyve1 (red) and  $\alpha$ CD45 (white). No GFP or Lyve1 fluorescence was observed in the *Spi1<sup>GFP/GFP</sup>* E18.5 dorsal cortex (33 $\mu$ m maximum intensity projection) but we observed Lyve1<sup>+</sup> cells in the skull. (b) Confocal analysis of *Spi1<sup>GFP/+</sup>* in the dorsal cortex (25 $\mu$ m maximum intensity projection) brain sections stained for Lyve1 (red), F4/80 (blue) and CD206 (white). White arrows indicate the conventional pvM population and red arrows show the non-conventional pvM population. (c) Immunofluorescence microscopy on brain parenchyma sections of *Spi1<sup>GFP/+</sup>* in the dorsal cortex, using an anti-GFP to enhance the GFP signal (green) with Lyve1 staining labeled in red. White arrows indicate the conventional pvM population and red arrows show the non-conventional pvM population. (d) Different representative immunofluorescence stainings of adult *Cx3cr1<sup>GFP/+</sup>*; *Cx3cr1-Cre*; *Rosa26<sup>tdT</sup>* mouse brain sections, showing Lyve1<sup>+</sup>CX3CR1<sup>+</sup> (white arrows), Lyve1<sup>+</sup>CX3CR1<sup>-</sup> (red arrows) and Lyve1<sup>-</sup> pvM population (pink arrows) expressed tdTomato. (n= 3). (e) Flow cytometry gating strategy of *Cxcr4-CreErt2*; *Rosa26<sup>tdT</sup>* brain parenchyma showing microglia (MG) lacking tdTomato reporter expression and monocytes/neutrophils (Mono/Neutro) partially positive for tdTomato.



## Supplemental Figure 6

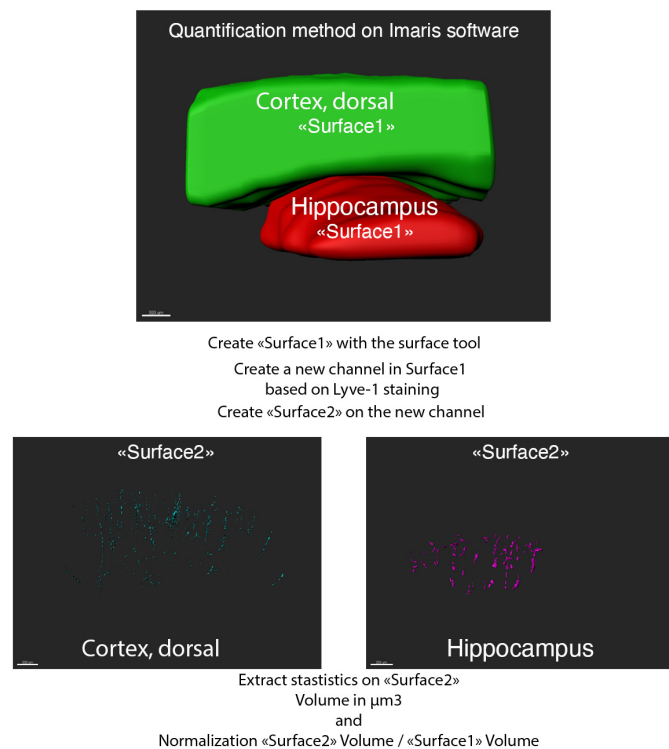

**Supplementary Figure 6: Lightsheet data quantification method using Imaris software.** To quantify the Lyve1 staining in cleared brains imaged by lightsheet microscopy, Imaris software was used. Using the “Surface tool” of Imaris, a 3D Rendering function, a first volume was created, named « Surface1 » at different locations (Dorsal cortex and hippocampus) where we wanted to quantify the staining. Based on Lyve1 labelling, a new channel was created. This new channel was used to create a new volume called « Surface 2 » representing the Lyve1 staining. Imaris calculated the different volumes in  $\mu\text{m}^3$ . The ratio « Surface2 » / « Surface1 » allows us to normalize the Lyve1 quantification.

**Supplementary Table 1: Antibodies used for immunofluorescence and flow cytometry**

| <b>Primary</b>     |                                    |              |                 |                     |
|--------------------|------------------------------------|--------------|-----------------|---------------------|
| <b>Antibodies</b>  | <b>Source</b>                      | <b>Clone</b> | <b>Dilution</b> | <b>Identifier</b>   |
| Lyve-1             | R&D systems                        | ND           | 1/500           | AF2125              |
| AQP4               | EMD Millipore                      | ND           | 1/800           | AB3594              |
| CD45               | eBioscience                        | 30F11        | 1/250           | 14-0451-85          |
| Iba1               | Abcam                              | ND           | 1/500           | ab107159            |
| CD31               | Thermo, abcam                      | ERMP12       | 1/200           | MA1-40074, ab119341 |
| Prox-1             | Reliatech                          | ND           | 1/150           | 102-PA32            |
| VEGFR3             | R&D systems                        | ND           | 1/200           | AF743               |
| PDGFR $\beta$      | Cell Signaling                     | ND           | 1/200           | 3169S               |
| ER-T7R             | Thermofisher                       | ER-TR7       | 1/50            | MA1-40076           |
| GFP                | AVES                               | ND           | 1/2000          | GFP-1020            |
| Podoplanin         | Millipore                          | 8.1.1        | 1/100           | MABT-1512           |
| Laminin $\alpha$ 1 | Sorokin L (University of Muenster) |              | n/a             | 317                 |
| Laminin $\gamma$ 1 | Sorokin L (University of Muenster) |              | n/a             | 3E10                |

| <b>Primary Coupled</b>  |                |                 |              |                   |
|-------------------------|----------------|-----------------|--------------|-------------------|
| <b>Antibodies</b>       | <b>Source</b>  | <b>Dilution</b> | <b>Clone</b> | <b>Identifier</b> |
| CD45-BUV395             | BD Biosciences | 1/300           | 30F11        | 564279            |
| F4/80-BV421             | Biolegend      | 1/200           | BM8          | 123131            |
| CD64-BV711              | Biolegend      | 1/100           | X54-5/7.1    | 139311            |
| CD206-BV785             | Biolegend      | 1/200           | C068C2       | 141729            |
| Ly6C-BV510              | Biolegend      | 1/200           | HK1.4        | 128033            |
| Ly6G-AF700              | BD Pharmingen  | 1/600           | 1A8          | 561236            |
| Lyve1-eF660             | eBioscience    | 1/50            | ALY7         | 50-0443-82        |
| CD163-SB600             | eBioscience    | 1/200           | TNKUPJ       | 63-1631-82        |
| CD11b-BV605             | BD Biosciences | 1/200           | M1/70        | 563015            |
| GFAP-A647               | Biolegend      | 1/200           | 2E1.E9       | 644706            |
| MHCII-PE                | Biolegend      | 1/400           | M5/114       | 562352            |
| F4/80-A647              | Biolegend      | 1/200           | BM8          | 123122            |
| $\alpha$ -SMA-A488      | Thermofisher   | 1/500           | 1A4          | 53-9760-82        |
| <b>Viability marker</b> |                |                 |              |                   |
| Zombie NIR Fixable Kit  | Biolegend      | 1/500           |              | 423105            |

| <b>Secondary</b>  |                        |                 |                   |
|-------------------|------------------------|-----------------|-------------------|
| <b>Antibodies</b> | <b>Source</b>          | <b>Dilution</b> | <b>Identifier</b> |
| DaChCy3           | Jackson ImmunoResearch | 1/400           | 703-166-155       |
| DaG 488           | Thermofisher           | 1/400           | A-11055           |
| DaG 555           | Thermofisher           | 1/400           | A-21432           |
| DaG 647           | Thermofisher           | 1/400           | A-21447           |
| DaG 790           | Jackson ImmunoResearch | 1/400           | 712-655-153       |
| DaR 488           | Thermofisher           | 1/400           | A-21208           |
| DaR 594           | Thermofisher           | 1/400           | SA5-10028         |
| DaR 647           | Jackson ImmunoResearch | 1/400           | 712-605-153       |
| DaRb 488          | Thermofisher           | 1/400           | A-21206           |
| DaRb 555          | Thermofisher           | 1/400           | A-31572           |
| DaRb 647          | Jackson ImmunoResearch | 1/400           | 711-605-152       |

**Supplementary Table 2: Parameters used to filter cells in NGS analysis.**

Cells were filtered out based on number of detected genes, number of UMIs and percentage of mitochondrial and ribosomal genes. Values adapted to each sample were used for this quality control step.

|            | Feature_max | Feature_min | Mitopct_max | Ribopct_min | UMI_max | UMI_min |
|------------|-------------|-------------|-------------|-------------|---------|---------|
| Juvenile-1 | 4000        | 500         | 10          | 1           | 15000   | 500     |
| Juvenile-2 | 5000        | 500         | 10          | 1           | 20000   | 500     |
| Juvenile-3 | 5000        | 500         | 8           | 1           | 15000   | 500     |
| Juvenile-4 | 4000        | 500         | 10          | 1           | 15000   | 500     |
| Adult-1    | 4000        | 0           | 8           | 1           | 25000   | 500     |
| Adult-2    | 4000        | 0           | 5           | 1           | 15000   | 500     |
| Aged-1     | 3500        | 0           | 10          | 1           | 15000   | 500     |
| Aged-2     | 3500        | 0           | 10          | 1           | 15000   | 500     |
