# Supplementary material for: Deciphering the heterogeneity of the Lyve1+ perivascular macrophages in the mouse brain
Source: PubMed Central journal article supplement (PMC9712536; doi:10.1038/s41467-022-35166-9), 2022-11-30
Supplement: 41467_2022_35166_MOESM10_ESM.pdf [file 41467_2022_35166_MOESM10_ESM.pdf]

## Reporting Summary

Nature Research wishes to improve the reproducibility of the work that we publish. This form provides structure for consistency and transparency in reporting. For further information on Nature Research policies, see our [Editorial Policies](#) and the [Editorial Policy Checklist](#).

### Statistics

For all statistical analyses, confirm that the following items are present in the figure legend, table legend, main text, or Methods section.

n/a Confirmed

- The exact sample size ( $n$ ) for each experimental group/condition, given as a discrete number and unit of measurement
- A statement on whether measurements were taken from distinct samples or whether the same sample was measured repeatedly
- The statistical test(s) used AND whether they are one- or two-sided  
*Only common tests should be described solely by name; describe more complex techniques in the Methods section.*
- A description of all covariates tested
- A description of any assumptions or corrections, such as tests of normality and adjustment for multiple comparisons
- A full description of the statistical parameters including central tendency (e.g. means) or other basic estimates (e.g. regression coefficient) AND variation (e.g. standard deviation) or associated estimates of uncertainty (e.g. confidence intervals)
- For null hypothesis testing, the test statistic (e.g.  $F$ ,  $t$ ,  $r$ ) with confidence intervals, effect sizes, degrees of freedom and  $P$  value noted  
*Give  $P$  values as exact values whenever suitable.*
- For Bayesian analysis, information on the choice of priors and Markov chain Monte Carlo settings
- For hierarchical and complex designs, identification of the appropriate level for tests and full reporting of outcomes
- Estimates of effect sizes (e.g. Cohen's  $d$ , Pearson's  $r$ ), indicating how they were calculated

*Our web collection on [statistics for biologists](#) contains articles on many of the points above.*

### Software and code

Policy information about [availability of computer code](#)

Data collection FACS ARIA III SORP sorter, LSRFortessa X-20 cytometer (BD Biosciences), Diva software (BD Biosciences)  
Lightsheet microscope Ultramicroscope II (LaVision BioTec, Miltenyi), Inspector software (version 5.1.304) (LaVision BioTec, Miltenyi)  
Confocal microscope LSM880 (Zeiss), Zen blue (Zeiss)  
10X Chromium system (10X Genomics), Illumina NextSeq 500 (Illumina), Cellranger (10x genomics)

Data analysis FlowJo software (version 10), Imaris software (version 9.1.0, Bitplane), ImageJ software (National Institutes of Health), GraphPad Prism (version 8.3.0), Seurat R package (version 4.1.0)

For manuscripts utilizing custom algorithms or software that are central to the research but not yet described in published literature, software must be made available to editors and reviewers. We strongly encourage code deposition in a community repository (e.g. GitHub). See the Nature Research [guidelines for submitting code & software](#) for further information.

### Data

Policy information about [availability of data](#)

All manuscripts must include a [data availability statement](#). This statement should provide the following information, where applicable:

- Accession codes, unique identifiers, or web links for publicly available datasets
- A list of figures that have associated raw data
- A description of any restrictions on data availability

The sequencing data generated in this study have been deposited in the GEO repository with the accession number GSE133283. Scripts and detailed instructions to reproduce the NGS analysis for this manuscript are available on GitHub repository [https://github.com/JulieBvs/SPlab\\_PVM2](https://github.com/JulieBvs/SPlab_PVM2)

## Field-specific reporting

Please select the one below that is the best fit for your research. If you are not sure, read the appropriate sections before making your selection.

- Life sciences       Behavioural & social sciences       Ecological, evolutionary & environmental sciences

For a reference copy of the document with all sections, see [nature.com/documents/nr-reporting-summary-flat.pdf](https://www.nature.com/documents/nr-reporting-summary-flat.pdf)

## Life sciences study design

All studies must disclose on these points even when the disclosure is negative.

|                 |                                                                                                                                                      |
|-----------------|------------------------------------------------------------------------------------------------------------------------------------------------------|
| Sample size     | Power analysis was performed to estimate the number of experimental mice                                                                             |
| Data exclusions | No data exclusions unless stated otherwise                                                                                                           |
| Replication     | The experimental findings were reliably reproduced. We further provide thoroughly detailed methods describing the critical steps of each experiment. |
| Randomization   | No randomization was performed since animals were compared with co-housed litter-mate controls.                                                      |
| Blinding        | N/A                                                                                                                                                  |

## Reporting for specific materials, systems and methods

We require information from authors about some types of materials, experimental systems and methods used in many studies. Here, indicate whether each material, system or method listed is relevant to your study. If you are not sure if a list item applies to your research, read the appropriate section before selecting a response.

### Materials & experimental systems

|                                     |                                                                 |
|-------------------------------------|-----------------------------------------------------------------|
| n/a                                 | Involved in the study                                           |
| <input type="checkbox"/>            | <input checked="" type="checkbox"/> Antibodies                  |
| <input checked="" type="checkbox"/> | <input type="checkbox"/> Eukaryotic cell lines                  |
| <input checked="" type="checkbox"/> | <input type="checkbox"/> Palaeontology and archaeology          |
| <input type="checkbox"/>            | <input checked="" type="checkbox"/> Animals and other organisms |
| <input checked="" type="checkbox"/> | <input type="checkbox"/> Human research participants            |
| <input checked="" type="checkbox"/> | <input type="checkbox"/> Clinical data                          |
| <input checked="" type="checkbox"/> | <input type="checkbox"/> Dual use research of concern           |

### Methods

|                                     |                                                    |
|-------------------------------------|----------------------------------------------------|
| n/a                                 | Involved in the study                              |
| <input checked="" type="checkbox"/> | <input type="checkbox"/> ChIP-seq                  |
| <input type="checkbox"/>            | <input checked="" type="checkbox"/> Flow cytometry |
| <input checked="" type="checkbox"/> | <input type="checkbox"/> MRI-based neuroimaging    |

## Antibodies

Antibodies used

Antibodies used for microscopy:

Lyve-1 R&D systems (AF2125); AQP4 R&D systems (AB3594); GFAP Biologend (644706); CD45 eBioscience (14-0451-85); F4/80 Biologend (123122); Iba1 Abcam (ab107159); CD163 (Anders homemade); CD11b eBioscience (16-0112-82); CD206 Thermofisher (48-2061-82); CD31 Thermo (MA1-40074); Prox-1 Reliatech (102-PA32); VEGFR3 R&D systems (AF743);  $\alpha$ -SMA Thermofisher (53-9760-82); PDGFR $\beta$  Cell Signaling (3169S); ER-T7R Thermofisher (MA1-40076); GFP AVES (GFP-1020); Laminin  $\alpha$ 1 Sorokin L (University of Muenster); Laminin  $\gamma$ 1 Sorokin L (University of Muenster); DaChCy3 Jackson ImmunoResearch (703-166-155); DaG 488 Thermofisher (A-11055); DaG 555 Thermofisher (A-21432); DaG 647 Thermofisher A-21447; DaG 790 Jackson ImmunoResearch (712-655-153); DaR 488 Thermofisher (A-21208); DaR 594 Thermofisher (SA5-10028); DaR 647 Jackson ImmunoResearch (712-605-153); DaRb 488 Thermofisher (A-21206); DaRb 555 Thermofisher (A-31572); DaRb 647 Jackson ImmunoResearch (711-605-152)

Antibodies used for cytometry:

CD45-BUV395 (BD biosciences 564279), Lyve1-eFluor660 (eBioscience 50-0443-82) and F4/80-BV421 (Biolegend 123131) CD64-BV711 (Biolegend 139311), CD206-BV785 (Biolegend 141729) Csf1R-PECy7 (Biolegend 135524), CD163-SB600 (eBioscience 63-1631-82), CD11b-BV605 (BD Biosciences 563015), MHCI-PE (Biolegend 562352), CD11b-BV605 (BD Biosciences 563015), CX3CR1-PECy7 (Biolegend 149015), Ly6C-BV510 (Biolegend 128033), LY6G-AF700 (BD Pharmingen 561236)

Validation

All the antibodies used in this study were optimized and validated (i.e. assay and species) by suppliers and used according to supplied instructions. Most antibodies were re-evaluated and appropriate dilutions were determined by titration.

## Animals and other organisms

Policy information about [studies involving animals](#); [ARRIVE guidelines](#) recommended for reporting animal research

|                         |                                                                                                                                                                                                                                                                                                                                                                                                                                                                                                                                                                                                                                                                                                                                                                               |
|-------------------------|-------------------------------------------------------------------------------------------------------------------------------------------------------------------------------------------------------------------------------------------------------------------------------------------------------------------------------------------------------------------------------------------------------------------------------------------------------------------------------------------------------------------------------------------------------------------------------------------------------------------------------------------------------------------------------------------------------------------------------------------------------------------------------|
| Laboratory animals      | C57BL/6J mice were obtained from Charles River [France]. Prox-CreERT2+/- and Wnt1-Cre mice were kindly provided by Dr. Bajénoff (CIML, Marseille, France). Cx3cr1GFP mice were kindly provided by Dr. Lelouard (CIML, Marseille, France). Spi1GFP (PU.1), Cxcr4-CreErt2;Rosa26tdT and Prox1mOrange2 were bred and maintained at the CIML (Marseille, France) under specific pathogen free conditions. Prox-CreERT2+/-, Wnt1-Cre and Cx3cr1-Cre lines were crossed to homozygosity for the tdTomato reporter using Rosa26tdT mice. P2, P7, P14, P21 and adult (8-10 weeks) and one year old mice (male and female) were used in this study. All mice were co-housed in the same room under similar conditions with water and food ad libitum and 12h/12h night/daylight cycle. |
| Wild animals            | The study did not involve wild animals.                                                                                                                                                                                                                                                                                                                                                                                                                                                                                                                                                                                                                                                                                                                                       |
| Field-collected samples | The study did not involve field-collected samples.                                                                                                                                                                                                                                                                                                                                                                                                                                                                                                                                                                                                                                                                                                                            |
| Ethics oversight        | All experiments were reviewed and approved by the local ethics committee of Aix-Marseille University and the Ministère de l'Enseignement Supérieur, de la Recherche et de l'Innovation.                                                                                                                                                                                                                                                                                                                                                                                                                                                                                                                                                                                       |

Note that full information on the approval of the study protocol must also be provided in the manuscript.

## Flow Cytometry

### Plots

Confirm that:

- The axis labels state the marker and fluorochrome used (e.g. CD4-FITC).
- The axis scales are clearly visible. Include numbers along axes only for bottom left plot of group (a 'group' is an analysis of identical markers).
- All plots are contour plots with outliers or pseudocolor plots.
- A numerical value for number of cells or percentage (with statistics) is provided.

### Methodology

|                           |                                                                                                                                                                                                                                                                                                                                                                                                                                                                                                                                                                                                                                                                                                                                                                                                                                                                                                                                                                                                                                    |
|---------------------------|------------------------------------------------------------------------------------------------------------------------------------------------------------------------------------------------------------------------------------------------------------------------------------------------------------------------------------------------------------------------------------------------------------------------------------------------------------------------------------------------------------------------------------------------------------------------------------------------------------------------------------------------------------------------------------------------------------------------------------------------------------------------------------------------------------------------------------------------------------------------------------------------------------------------------------------------------------------------------------------------------------------------------------|
| Sample preparation        | Mice were anesthetized using Ketamine and Xylazine. Cx3cr1GFP mouse brains from male mice were collected after perfusion with ice cold PBS-Heparin (after removal of the dura). Brains were cut sagittally in 6-8 pieces, then digested with the Adult Brain Dissociation Kit (Miltenyi, 130-107-677) at 37°C for 30min on the gentleMACS dissociator (Miltenyi). Brain cell suspensions were filtered over 70µm strainers and filters were washed with 10mL HBSS 2%FBS. After centrifugation (5min, 400g, 4°C), debris were removed using a 40% Percoll (Sigma-Aldrich, GE17-0891-02) solution in PBS. Cells were centrifuged (30min, 500g, 4°C) and supernatant was discarded. Red blood cell lysis was performed for 10 min at 4°C using the Miltenyi RBC lysis buffer from the kit. Lysis was stopped with 9mL HBSS 2%FBS and cells were centrifuged (5min, 400g, 4°C). Cells were then blocked (15% normal mouse serum (Jackson ImmunoResearch 015-000-120) in FACS buffer (HBSS 2% FBS) for 15 min and subsequently stained. |
| Instrument                | FACS ARIA III SORP sorter, LSRFortessa X-20 cytometer (BD Biosciences)                                                                                                                                                                                                                                                                                                                                                                                                                                                                                                                                                                                                                                                                                                                                                                                                                                                                                                                                                             |
| Software                  | FlowJo software (version 10)                                                                                                                                                                                                                                                                                                                                                                                                                                                                                                                                                                                                                                                                                                                                                                                                                                                                                                                                                                                                       |
| Cell population abundance | Sorted populations were >95%                                                                                                                                                                                                                                                                                                                                                                                                                                                                                                                                                                                                                                                                                                                                                                                                                                                                                                                                                                                                       |
| Gating strategy           | pVMs were defined as Lyve-1+F4/80+CD206+CD64+. Additional markers were employed to characterize pVMs: Cx3cr1, CD45, CD163.                                                                                                                                                                                                                                                                                                                                                                                                                                                                                                                                                                                                                                                                                                                                                                                                                                                                                                         |

- Tick this box to confirm that a figure exemplifying the gating strategy is provided in the Supplementary Information.
